# Supplementary material
Source: HighWire-hosted journal article supplement (https://thorax.bmj.com/content/76/1/37)
Supplement: inline-supplementary-material-1 [file inline-supplementary-material-1.pdf]

*Supplemental Appendix to:*

**Minimum important difference of the EQ5D and EQ-VAS in fibrotic interstitial lung disease**

*Tsai et al.*

*Subgroup analysis comparison of baseline characteristics*

**Table E1.** Baseline characteristics across ILD subtypes.

*Patient characteristics at 6 months follow up*

**Table E2.** Baseline characteristics of patients with and without 6-month follow-up.

*Subgroup analysis of MID for EQ-5D-5L*

**Table E3.** IPF subgroup analysis of anchor- and distribution-based estimates of MID for EQ-5D-5L

**Table E4.** CTD-ILD subgroup analysis of anchor- and distribution-based estimates of MID for EQ-5D-5L

**Table E1.** Baseline patient characteristics across ILD subtypes.

| Variable             | IPF         | CTD-ILD     | HP          | Unclassifiable<br>ILD | Other ILDs  |
|----------------------|-------------|-------------|-------------|-----------------------|-------------|
| Total sample size    | 472 (26%)   | 665 (37%)   | 135 (7%)    | 314 (17%)             | 55 (3%)     |
| Age, years           | 71 ± 9      | 60 ± 12     | 63 ± 11     | 67 ± 11               | 62 ± 17     |
| Male sex             | 346 (73%)   | 214 (32%)   | 56 (41%)    | 175 (56%)             | 27 (49%)    |
| Ever-smoker          | 352 (75%)   | 336 (51%)   | 77 (57%)    | 200 (64%)             | 28 (51%)    |
| Smoking pack-years   | 27 (11-38)  | 20 (5-30)   | 24 (8-36)   | 25 (8-36)             | 33 (18-45)  |
| FVC, %-predicted     | 74 ± 19     | 74 ± 20     | 68 ± 20     | 76 ± 20               | 79 ± 22     |
| DLCO, %-predicted    | 50 ± 17     | 57 ± 19     | 54 ± 18     | 59 ± 20               | 64 ± 27     |
| 6MWD, meters         | 393 ± 133   | 433 ± 125   | 400 ± 121   | 415 ± 128             | 456 ± 113   |
| SGRQ total score     | 43 ± 20     | 42 ± 20     | 50 ± 18     | 50 ± 19               | 50 ± 20     |
| UCSDSOBQ total score | 36 ± 27     | 37 ± 26     | 43 ± 27     | 40 ± 29               | 44 ± 29     |
| EQ-5D-5L             | 0.79 ± 0.16 | 0.77 ± 0.19 | 0.76 ± 0.18 | 0.75 ± 0.22           | 0.73 ± 0.22 |
| EQ-VAS               | 69 ± 19     | 68 ± 19     | 63 ± 19     | 67 ± 20               | 65 ± 20     |

Data shown are number (%), mean ± standard deviation, or median (interquartile range).

Abbreviations: 6MWD, 6-minute walk distance; CTD-ILD, connective tissue disease-associated ILD; DLCO, diffusing capacity of the lung for carbon monoxide; EQ-5D-5L, European Quality of Life 5 Dimensions 5 Levels questionnaire; EQ-VAS, European Quality of Life visual analogue scale; FVC, forced vital capacity; HP, hypersensitivity pneumonitis; ILD, interstitial lung disease; IPF, idiopathic pulmonary fibrosis; SD, standard deviation; SGRQ, St. George's Respiratory Questionnaire; UCSD-SOBQ, University of California, San Diego Shortness of Breath Questionnaire.

**Table E2.** Baseline characteristics of patients with and without 6-month follow-up.

| Variable              | Patients with 6-month data available | Patients without 6-month data available |
|-----------------------|--------------------------------------|-----------------------------------------|
| Total patients        | 636                                  | 1180                                    |
| Age, years            | 61 ± 13                              | 63 ± 15                                 |
| Male sex              | 326 (52%)                            | 914 (50%)                               |
| Ever-smoker           | 426 (64%)                            | 1108 (61%)                              |
| Smoking pack-years    | 24 (7-36)                            | 25 (8-36)                               |
| FVC, %-predicted      | 74 ± 19                              | 74 ± 20                                 |
| DLCO, %-predicted     | 57 ± 19                              | 57 ± 20                                 |
| 6MWD, meters          | 433 ± 122                            | 417 ± 127                               |
| SGRQ total score      | 43 ± 19                              | 45 ± 20                                 |
| UCSD SOBQ total score | 35 ± 25                              | 38 ± 27                                 |
| EQ-5D-5L              | 0.785 ± 0.18                         | 0.771 ± 0.19                            |
| EQ-VAS                | 69 ± 19                              | 68 ± 19                                 |

Data shown are number (%), mean ± standard deviation, or median (interquartile range).

Abbreviations: 6MWD, 6-minute walk distance; DLCO, diffusing capacity of the lung for carbon monoxide; EQ-5D-5L, European Quality of Life 5 Dimensions 5 Levels questionnaire; EQ-VAS, European Quality of Life visual analogue scale; FVC, forced vital capacity; IQR, interquartile range; SGRQ, St. George's Respiratory Questionnaire; UCSD-SOBQ, University of California, San Diego Shortness of Breath Questionnaire.

**Table E3.** IPF subgroup analysis of anchor- and distribution-based estimates of MID for EQ5D.

| <b>Anchor-based MID</b>       |                                 |                |                 |
|-------------------------------|---------------------------------|----------------|-----------------|
| EQ-5D-5L                      | Linear regression equation      | MID for anchor | EQ-5D-5L MID    |
| SGRQ                          | EQ-5D-5L = 1.031 - 0.006*SGRQ   | 5 to 8         | 0.030 to 0.046  |
| UCSDSOBQ                      | EQ-5D-5L = 0.952 - 0.004*UCSD   | 5              | 0.022           |
| FVC                           | EQ-5D-5L = 0.631 + 0.0022*FVC   | 2 to 6         | 0.0044 to 0.013 |
| DLCO                          | EQ-5D-5L = 0.687 + 0.00239*DLCO | 11             | 0.026           |
| 6MWD                          | EQ-5D-5L = 0.684 + 0.00032*6MWD | 20.7 to 35.4m  | 0.0065 to 0.011 |
| EQ-VAS                        | Linear regression equation      | MID for anchor | EQ-VAS MID      |
| SGRQ                          | EQ-VAS = 95.35 - 0.61*SGRQ      | 5 to 8         | 3.067 to 4.91   |
| UCSD                          | EQ-VAS = 83.96 - 0.40*UCSD      | 5              | 2.02            |
| FVC                           | EQ-VAS = 50.50 + 0.25*FVC       | 2 to 6         | 0.50 to 1.51    |
| DLCO                          | EQ-VAS = 52.38 + 0.34*DLCO      | 11             | 3.79            |
| 6MWD                          | EQ-VAS = 50.26 + 0.054*6MWD     | 20.7 to 35.4m  | 1.13 to 1.92    |
| <b>Distribution-based MID</b> |                                 |                |                 |
|                               | SEM                             | One-half SD    |                 |
| EQ-5D-5L                      | 0.073                           | 0.082          |                 |
| EQ-VAS                        | 8.5                             | 9.5            |                 |

Abbreviations: 6MWD, 6-minute walk distance; DLCO, diffusing capacity of the lung for carbon monoxide; EQ-5D-5L, European Quality of Life 5 Dimensions 5 Levels questionnaire; EQ-VAS, European Quality of Life visual analogue scale; FVC, forced vital capacity; SGRQ, St. George's Respiratory Questionnaire; UCSD-SOBQ, University of California, San Diego Shortness of Breath Questionnaire.

**Table E4.** CTD-ILD subgroup analysis of anchor- and distribution-based estimates of MID for the EQ5D.

| <b>Anchor-based MID</b>       |                                 |                |                 |
|-------------------------------|---------------------------------|----------------|-----------------|
| EQ-5D-5L                      | Linear regression equation      | MID for anchor | EQ-5D-5L MID    |
| SGRQ                          | EQ-5D-5L = 1.028 - 0.006*SGRQ   | 5 to 8         | 0.032 to 0.052  |
| UCSD                          | EQ-5D-5L = 0.946 - 0.005*UCSD   | 5              | 0.024           |
| FVC                           | EQ-5D-5L = 0.578 + 0.003*FVC    | 2 to 6         | 0.0053 to 0.016 |
| DLCO                          | EQ-5D-5L = 0.627 + 0.003*DLCO   | 11             | 0.031           |
| 6MWD                          | EQ-5D-5L = 0.518 + 0.00059*6MWD | 20.7 to 35.4m  | 0.012 to 0.021  |
| EQ-VAS                        | Linear regression equation      | MID for anchor | EQ-VAS MID      |
| SGRQ                          | EQ-VAS = 92.89 - 0.61*SGRQ      | 5 to 8         | 3.05 to 4.88    |
| UCSD                          | EQ-VAS = 83.25 - 0.42*UCSD      | 5              | 2.18            |
| FVC                           | EQ-VAS = 49.67 + 0.26*FVC       | 2 to 6         | 0.51 to 1.54    |
| DLCO                          | EQ-VAS = 53.70 + 0.28*DLCO      | 11             | 3.08            |
| 6MWD                          | EQ-VAS = 43.19 + 0.059*6MWD     | 20.7 to 35.4m  | 1.22 to 2.08    |
| <b>Distribution-based MID</b> |                                 |                |                 |
|                               | SEM                             | One-half SD    |                 |
| EQ-5D-5L                      | 0.076                           | 0.095          |                 |
| EQ-VAS                        | 7.7                             | 9.6            |                 |

Abbreviations: 6MWD, 6-minute walk distance; DLCO, diffusing capacity of the lung for carbon monoxide; EQ-5D-5L, European Quality of Life-5 Dimensions 5 Levels questionnaire; EQ-VAS, European Quality of Life visual analogue scale; FVC, forced vital capacity; MID, minimum important difference; SD, standard deviation; SGRQ, St. George's Respiratory Questionnaire; UCSD-SOBQ, University of California, San Diego Shortness of Breath Questionnaire.
